# Supplementary material for: Impacts of recent eutrophication and deoxygenation on the sediment biogeochemistry in the Sea of Marmara
Source: Copernicus journal article supplement (doi:10.5194/egusphere-2025-1255), 2025-03-25
Supplement: Supplementary file [file egusphere-2025-1255-AC2-supplement.pdf]

## **Response**

We would like to express our gratitude to Sergey Konovalov (reviewer 1). Thank you for your valuable comments. We tried to do our best for all the suggestions. All changes were in the manuscript were highlighted. Most notably, the language of the manuscript was improved. We preferred to keep Table 2 since it represents the data of physical and biochemical parameters in the deep water. Figure 4 represents the vertical profiles of nutrients for the sediment core samples. Finally, as requested by the reviewer, data and discussion of major non-redox-sensitive elements were eliminated for a better focus on the main message on eutrophication impact on sediments.

Best regards,

İsmail Akçay
